# Supplementary material for: Regulation of the programmed cell death protein 1/programmed cell death ligand 1 axis in relapsing–remitting multiple sclerosis
Source: PubMed Central journal article supplement (PMC10411318; doi:10.1093/braincomms/fcad206), 2023-07-25
Supplement: fcad206_supplementary_data.pdf [file fcad206_supplementary_data.pdf]

## Supplementary Figure 1: Cluster and SAM analysis of multiparametric flow cytometry data

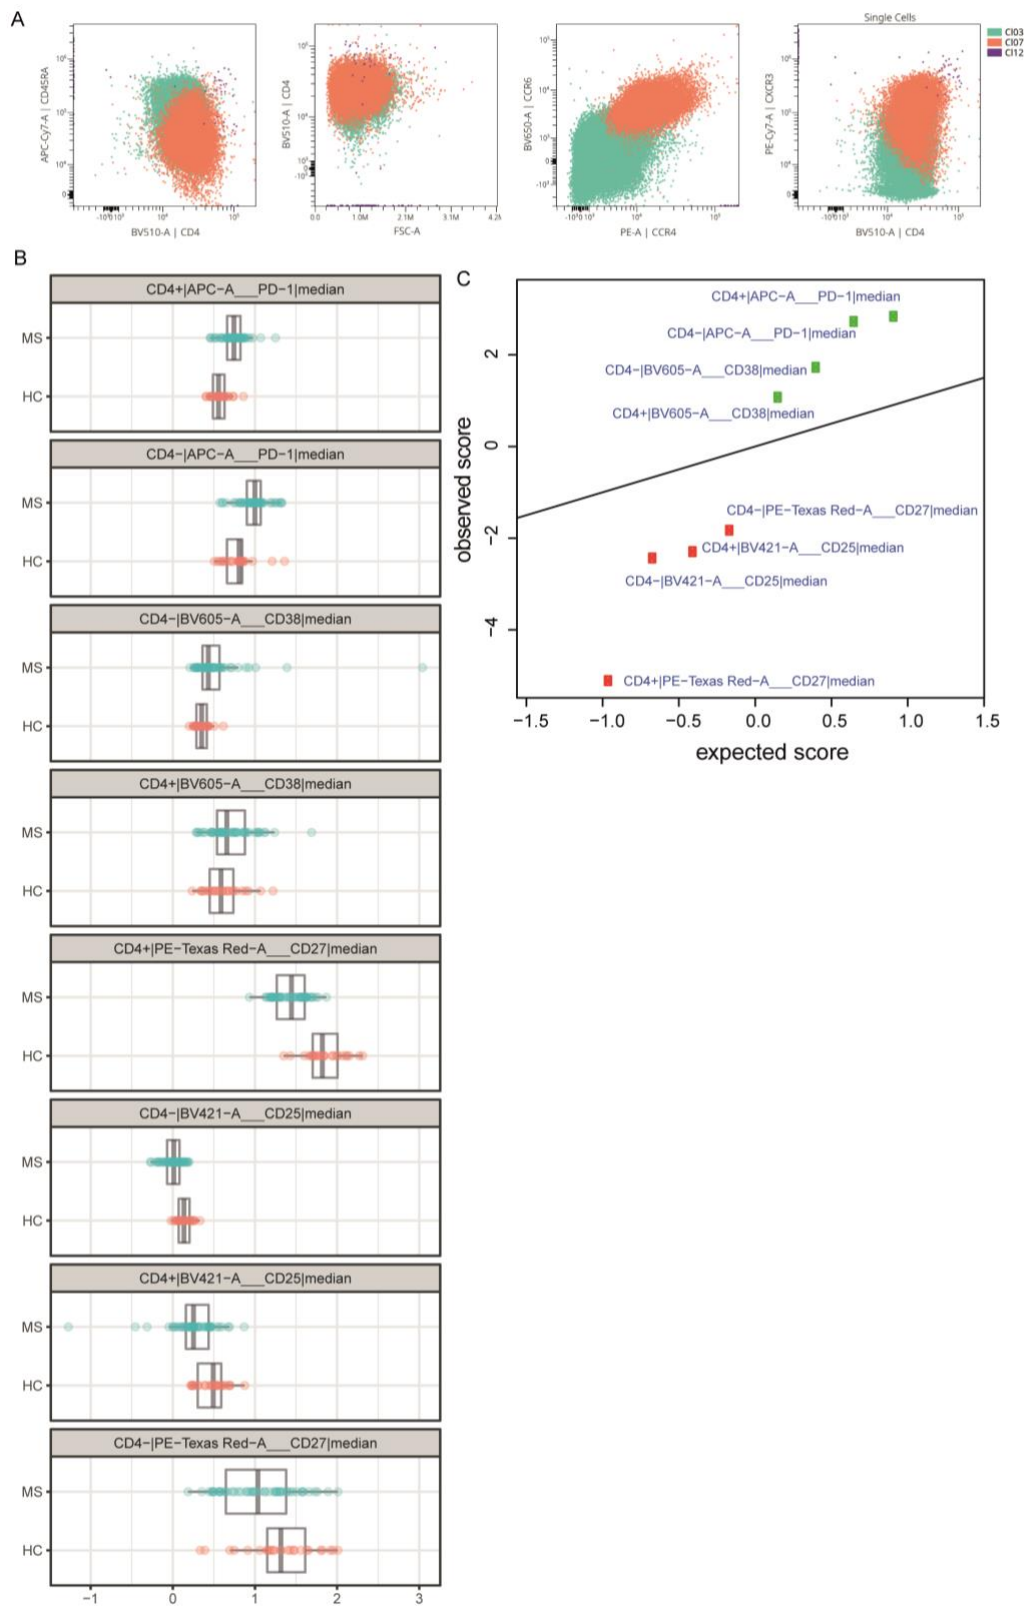

(A) Analysis of Cluster 3, Cluster 7 and Cluster 12 identified by FlowSOM cluster based on their expression of CD4, CD45RA, CCR6, CCR4 and CXCR3. (B) SAM analysis of

CD3+CD4+ and CD3+CD4- cells in healthy controls (CONT) and Multiple Sclerosis (MS) patients based on the median fluorescent intensities of activation markers PD-1, CD38, CD27, CD25. Two class unpaired analysis with 100 permutations and 0.1 FDR cutoff. Features are ranked by significance. (C) Significance features score plot of SAM analysis.

### Supplementary Figure 2: Membranous PD-1 expression on PBMCs

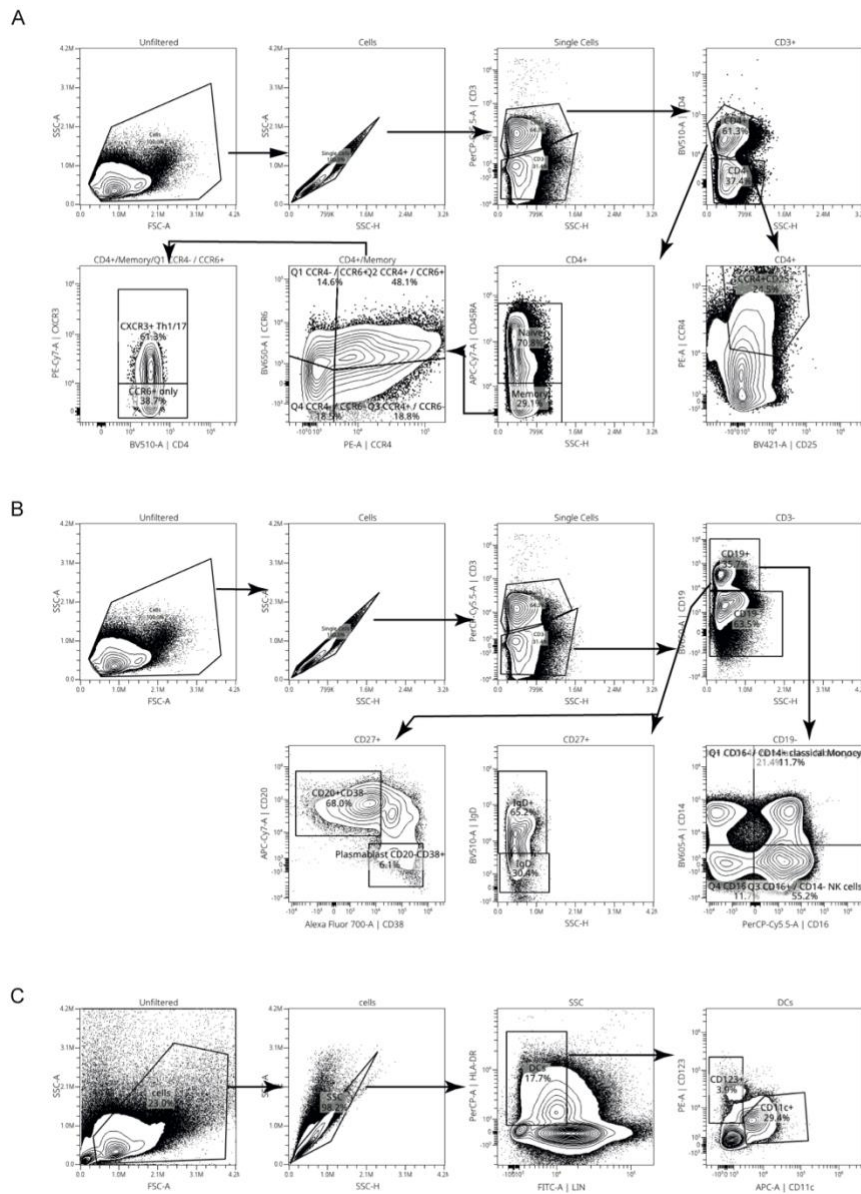

(A) Gating strategy for T cell panel. Following FSC-A/SSC-A discrimination, cell types were gated by positive or negative selection based on surface marker expression. CD45RA+, CCR4-, CCR6- (Th0); CD45RA-, CCR4-, CCR6- (Th2); CCR4+, CCR6+, CXCR3- (Th17), CCR4+, CCR6-, CXCR3+ (Th1). (B) Gating for B cell panel, monocyte subpopulations and NK cells. Following FSC-A/SSC-A discrimination, cell types were gated by positive or negative selection based on surface marker expression. CD3-, CD19+ (B cells); CD3-, CD19+, CD27- (naïve B

cells); CD3-, CD19+, CD27+ (memory B cells); CD3-, CD19+, CD27+, CD20-, CD38+ (plasmablasts); CD3-, CD19+, CD27+, IgD+ (IgD+ B cells); CD3-, CD19-, CD14+ (monocytes); CD3-, CD19-, CD14+, CD16- (classical monocytes); CD3-, CD19-, CD14+, CD16+ (non-classical monocytes), CD3-, CD19-, CD14-, CD16+ (NK cells). (C) Gating for dendritic cell subpopulations. Following FSC-A/SSC-A discrimination, cell types were gated by positive or negative selection based on surface marker expression. LIN-, HLA-DR+ (dendritic cells), LIN-, HLA-DR+, CD11c+ (myeloid dendritic cells), LIN-, HLA-DR+, CD11c- (plasmacytoid dendritic cells). CD = cluster of differentiation, LIN = lineage specific markers (CD3, CD14, CD16, CD19, CD20, CD56)

### Supplementary Figure 3: Membranous PD-1 expression on PBMCs

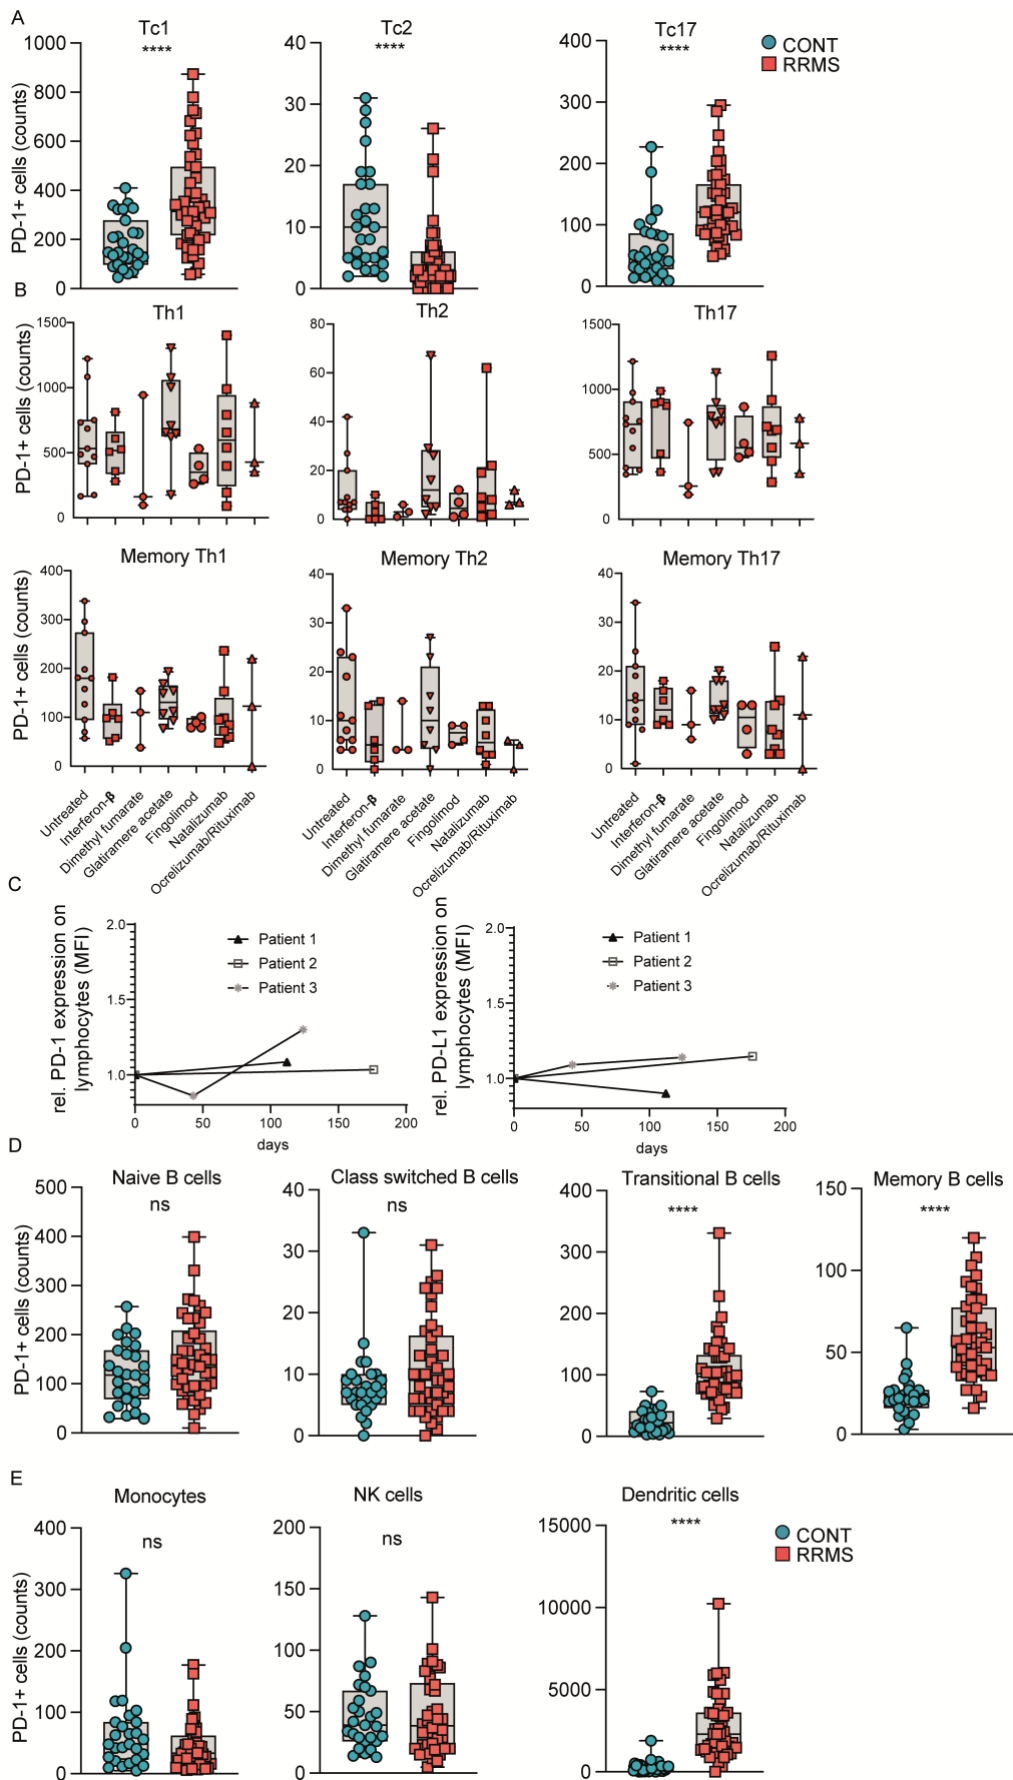

(A) PD-1 positive Tc1, Tc2 and Tc17 cells in controls (CONT) and Multiple Sclerosis (MS) patients. Unpaired two-tailed t-test with Welch's correction; \*\*\*\* $P < 0.0001$ ; Tc=T cytotoxic cells. (B) Detailed comparison of subtypes of T cells expressing PD-1 between non-treated and RRMS patients treated with interferon- $\beta$ , dimethyl fumarate, glatiramere acetate, fingolimod, natalizumab, ocrelizumab/rituximab. Significance levels were determined by One-way ANOVA. (C) Relative surface expressions of PD-1 and PD-L1 on lymphocytes was measured over different time periods in three patients with RRMS. Normalization was done based on initial MFI. For patient 1, the interval between blood samples was 2 days, for patient 2 176 days, and for patient 3 124 days. (D) PD-1 positive naïve B cells, class switched B cells, transitional B cells, memory B cells in controls (CONT) and Multiple Sclerosis (MS) patients. Unpaired two-tailed t-test with Welch's correction; ns not significant; \*\*\*\* $P < 0.0001$ . (E) Surface expression of PD-1 (counts) on monocytes, NK cells and dendritic cells in controls (CONT) and Multiple Sclerosis (MS) patients. Unpaired two-tailed t-test with Welch's correction; ns not significant; \*\*\*\* $P < 0.0001$ ; NK=natural killer cells

**Supplementary Figure 4: Patient age, gender and disease duration do not influence sPD-L1 concentration.**

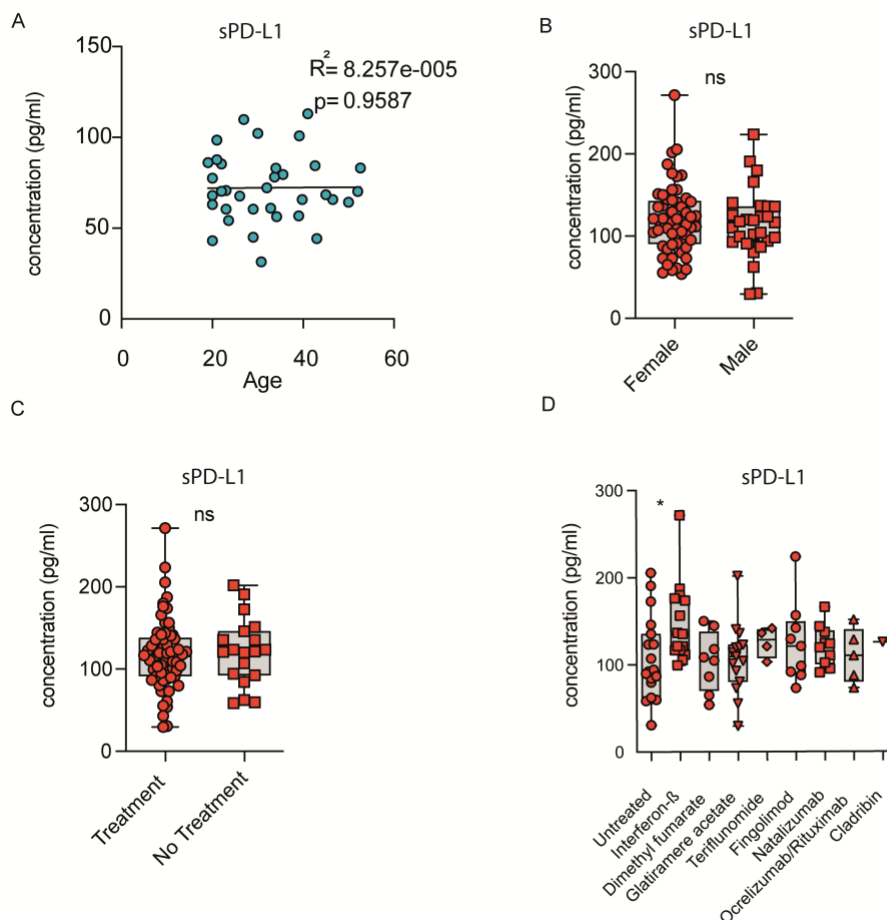

(A) Linear regression analysis of correlation between sPD-L1 concentration and patient age in control samples (n=36). Numbers indicate R<sup>2</sup> and P value of linear regression analysis. (B) Comparison of sPD-L1 concentration between female and male RRMS patients (n=84). Significance levels were determined by unpaired two-tailed t-test with Welch's correction, ns not significant. (C) Linear regression analysis of sPD-L1 concentration and disease duration since onset in RRMS patients (n=84) (D) Analysis of sPD-L1 concentration in non-treated and RRMS patients treated with interferon-  $\beta$ , dimethyl fumarate, glatiramer acetate, teriflunomide, fingolimod, natalizumab, ocrelizumab/rituximab, or cladribin (right, n=84). Significance levels were determined by One-way ANOVA; ns not significant; \* $P < 0.05$  (Supplementary Table 2).

**Supplementary Table 1: Control patients used for the analysis of membrane-bound and soluble PD-1 / PD-L1.**

| ID # Controls<br>(36) | Serum | PBMCs | Age | Sex    |
|-----------------------|-------|-------|-----|--------|
| 1                     | Yes   | Yes   | 35  | female |
| 2                     | Yes   | Yes   | 33  | female |
| 3                     | Yes   | Yes   | 39  | female |
| 4                     | Yes   | Yes   | 31  | female |
| 5                     | Yes   | Yes   | 24  | female |
| 6                     | Yes   | Yes   | 34  | female |
| 7                     | Yes   | Yes   | 43  | female |
| 8                     | Yes   | Yes   | 33  | female |
| 9                     | Yes   | Yes   | 47  | female |
| 10                    | Yes   | Yes   | 53  | female |
| 11                    | Yes   | Yes   | 19  | female |
| 12                    | Yes   | Yes   | 27  | female |
| 13                    | Yes   | Yes   | 39  | female |
| 14                    | Yes   | Yes   | 41  | female |
| 15                    | Yes   | Yes   | 43  | male   |
| 16                    | Yes   | Yes   | 34  | female |
| 17                    | Yes   | Yes   | 76  | male   |
| 18                    | Yes   | Yes   | 21  | female |
| 19                    | Yes   | Yes   | 39  | male   |
| 20                    | Yes   | Yes   | 29  | female |

|    |     |      |    |        |
|----|-----|------|----|--------|
| 21 | Yes | Yes  | 23 | female |
| 22 | Yes | Yes  | 52 | female |
| 23 | Yes | Yes  | 22 | female |
| 24 | Yes | Yes  | 26 | female |
| 25 | Yes | Yes  | 20 | female |
| 26 | Yes | Yes  | 30 | female |
| 27 | Yes | Yes  | 29 | male   |
| 28 | Yes | None | 23 | male   |
| 29 | Yes | None | 20 | female |
| 30 | Yes | None | 21 | male   |
| 31 | Yes | None | 20 | male   |
| 32 | Yes | None | 45 | female |
| 33 | Yes | None | 22 | male   |
| 34 | Yes | None | 50 | male   |
| 35 | Yes | None | 32 | male   |
| 36 | Yes | None | 43 | male   |

**Supplementary Table 2: RRMS patients used for the analysis of membrane-bound and soluble PD-1 / PD-L1.**

| ID # RRMS (84) | Serum | PBMCs | Age | Sex    | Duration (y) | EDSS | Treatment           | Treatment history                         | MRI-activity | Clinical activity |
|----------------|-------|-------|-----|--------|--------------|------|---------------------|-------------------------------------------|--------------|-------------------|
| 1              | Yes   | Yes   | 32  | female | 7            | 3.5  | Fingolimod          |                                           | stable       | Remission         |
| 2              | Yes   | Yes   | 28  | female | 1            | 1    | Natalizumab         | Interferon- $\beta$ , Fingolimod          | NA           | Remission         |
| 3              | Yes   | Yes   | 67  | female | 17           | 3.5  | Interferon- $\beta$ |                                           | active       | Remission         |
| 4              | Yes   | Yes   | 53  | female | 4            | 2    | Teriflunomide       |                                           | stable       | Remission         |
| 5              | Yes   | Yes   | 45  | female | 3            | 0    | Dimethyl fumarate   | Interferon- $\beta$                       | stable       | Remission         |
| 6              | Yes   | Yes   | 36  | male   | 2            | 3    | Fingolimod          | Interferon- $\beta$                       | stable       | Remission         |
| 7              | Yes   | Yes   | 37  | female | 13           | 2    | Natalizumab         | Interferon- $\beta$                       | stable       | Remission         |
| 8              | Yes   | Yes   | 50  | female | 3            | 2.5  | Fingolimod          | Interferon- $\beta$ . Glatiramere acetate | stable       | Remission         |
| 9              | Yes   | Yes   | 49  | female | 7            | 0    | Glatiramere acetate | Interferon- $\beta$                       | stable       | Remission         |

|    |     |     |    |        |    |     |                     |                                                                                   |        |           |
|----|-----|-----|----|--------|----|-----|---------------------|-----------------------------------------------------------------------------------|--------|-----------|
| 10 | Yes | Yes | 41 | female | 5  | 0   | Untreated           |                                                                                   | stable | Remission |
| 11 | Yes | Yes | 38 | female | 3  | 0   | Glatiramere acetate |                                                                                   | stable | Remission |
| 12 | Yes | Yes | 34 | female | 0  | 1   | Glatiramere acetate | Interferon- $\beta$                                                               | active | Remission |
| 13 | Yes | Yes | 39 | female | 0  | 3.5 | Untreated           |                                                                                   | active | Remission |
| 14 | Yes | Yes | 40 | female | 6  | 4   | Dimethyl fumarate   | Glatiramere acetate                                                               | stable | Remission |
| 15 | Yes | Yes | 51 | female | 1  | 3.5 | Natalizumab         |                                                                                   | stable | Remission |
| 16 | Yes | Yes | 40 | female | 11 | 0   | Interferon- $\beta$ |                                                                                   | active | Remission |
| 17 | Yes | Yes | 46 | female | 7  | 2   | Untreated           |                                                                                   | stable | Remission |
| 18 | Yes | Yes | 47 | female | 4  | 6.5 | Untreated           |                                                                                   | active | Remission |
| 19 | Yes | Yes | 35 | female | 3  | 4.5 | Untreated           |                                                                                   | active | Remission |
| 20 | Yes | Yes | 37 | female | 1  | 2.5 | Interferon- $\beta$ |                                                                                   | stable | Remission |
| 21 | Yes | Yes | 63 | female | 13 | 4   | Interferon- $\beta$ |                                                                                   | active | Remission |
| 22 | Yes | Yes | 37 | female | 20 | 2   | Fingolimod          | Interferon- $\beta$ ,<br>Dimethylfumarat                                          | stable | Remission |
| 23 | Yes | Yes | 40 | male   | 5  | 0   | Natalizumab         | Dimethylfumarat                                                                   | stable | Remission |
| 24 | Yes | Yes | 51 | male   | 7  | 6   | Untreated           |                                                                                   | active | Remission |
| 25 | Yes | Yes | 41 | female | 5  | 2.5 | Dimethyl fumarate   |                                                                                   | NA     | Remission |
| 26 | Yes | Yes | 50 | female | 3  | 2.5 | Glatiramere acetate |                                                                                   | stable | Remission |
| 27 | Yes | Yes | 33 | male   | 8  | 2   | Cladribin           | Interferon- $\beta$ ,<br>Dimethyl fumarate,<br>Glatiramere acetate,<br>Fingolimod | stable | Remission |
| 28 | Yes | Yes | 42 | female | 23 | 3   | Interferon- $\beta$ |                                                                                   | stable | Remission |
| 29 | Yes | Yes | 34 | female | 8  | 0   | Untreated           | Interferon- $\beta$ ,<br>Glatiramere acetate                                      | active | Remission |
| 30 | Yes | Yes | 22 | female | 5  | 1.5 | Ocrelizumab         | Dimethyl fumarate,<br>Natalizumab                                                 | active | Remission |
| 31 | Yes | Yes | 49 | male   | 12 | 2   | Interferon- $\beta$ |                                                                                   | stable | Remission |
| 32 | Yes | Yes | 33 | male   | 1  | 1.5 | Natalizumab         |                                                                                   | NA     | Remission |



|    |     |      |    |        |    |     |                     |                                                                    |        |           |
|----|-----|------|----|--------|----|-----|---------------------|--------------------------------------------------------------------|--------|-----------|
| 33 | Yes | Yes  | 52 | female | 10 | 3.5 | Fingolimod          |                                                                    | NA     | Remission |
| 34 | Yes | Yes  | 50 | female | 25 | 5.5 | Interferon- $\beta$ |                                                                    | NA     | Remission |
| 35 | Yes | Yes  | 55 | male   | 0  | 3.5 | Untreated           |                                                                    | NA     | Remission |
| 36 | Yes | Yes  | 51 | male   | 13 | 4.0 | Interferon- $\beta$ |                                                                    | NA     | Remission |
| 37 | Yes | Yes  | 59 | female | 33 | 4.0 | Untreated           | Daclizumab                                                         | NA     | Remission |
| 38 | Yes | Yes  | 45 | female | 21 | 7.0 | Glatiramere acetate |                                                                    | NA     | Remission |
| 39 | Yes | Yes  | 53 | female | 26 | 4.5 | Untreated           | Interferon- $\beta$ ,<br>Dimethylfumarat                           | NA     | Remission |
| 40 | Yes | Yes  | 48 | male   | 17 | 3.5 | Natalizumab         |                                                                    | NA     | Remission |
| 41 | Yes | Yes  | 58 | male   | 12 | 3.5 | Untreated           | none                                                               | active | Remission |
| 42 | Yes | Yes  | 55 | male   | 23 | 4.5 | Glatiramere acetate |                                                                    | NA     | Remission |
| 43 | Yes | Yes  | 43 | male   | 1  | 4.0 | Untreated           |                                                                    | NA     | Remission |
| 44 | Yes | Yes  | 41 | female | 23 | 4.5 | Ocrelizumab         | Interferon- $\beta$ ,<br>Fingolimod,<br>Natalizumab,<br>Daclizumab | NA     | Remission |
| 45 | Yes | Yes  | 40 | male   | 20 | 4   | Ocrelizumab         | Glatiramere acetate,<br>Natalizumab                                | stable | Remission |
| 46 | Yes | Yes  | 54 | male   | 7  | 6.5 | Glatiramere acetate |                                                                    | active | Remission |
| 47 | Yes | Yes  | 29 | male   | 7  | 2   | Glatiramere acetate |                                                                    | NA     | Remission |
| 48 | Yes | Yes  | 45 | male   | 11 | 2   | Natalizumab         | Glatiramere acetate                                                | NA     | Remission |
| 49 | Yes | Yes  | 47 | male   | 14 | 2   | Natalizumab         | Interferon- $\beta$ ,<br>Dimethyl fumarate                         | NA     | Remission |
| 50 | Yes | None | 38 | male   | 8  | 0   | Untreated           |                                                                    | stable | Remission |
| 51 | Yes | None | 44 | male   | 0  | 1   | Glatiramere acetate |                                                                    | stable | Remission |
| 52 | Yes | None | 64 | female | 5  | 2   | Glatiramere acetate | Interferon- $\beta$                                                | active | Remission |
| 53 | Yes | None | 55 | female | 8  | 2.5 | Fingolimod          | Interferon- $\beta$ ,<br>Glatiramere acetate                       | stable | Remission |

|    |     |      |    |        |     |     |                     |                                            |        |           |
|----|-----|------|----|--------|-----|-----|---------------------|--------------------------------------------|--------|-----------|
| 54 | Yes | None | 43 | female | 6   | 0   | Glatiramere acetate |                                            | stable | Remission |
| 55 | Yes | None | 26 | female | 6   | 0   | Dimethyl fumarate   | Interferon- $\beta$                        | stable | Remission |
| 56 | Yes | None | 40 | female | 15  | 0   | Dimethyl fumarate   | Interferon- $\beta$                        | stable | Remission |
| 57 | Yes | None | 56 | female | 15  | 1.5 | Interferon- $\beta$ |                                            | stable | Remission |
| 58 | Yes | None | 43 | male   | 9,5 | 0   | Fingolimod          | Interferon- $\beta$ ,<br>Dimethyl fumarate | stable | Remission |
| 59 | Yes | None | 37 | female | 3   | 0   | Interferon- $\beta$ |                                            | stable | Remission |
| 60 | Yes | None | 34 | female | 9   | 0   | Interferon- $\beta$ |                                            | NA     | Remission |
| 61 | Yes | None | 33 | female | 3   | 0   | Dimethyl fumarate   |                                            | stable | Remission |
| 62 | Yes | None | 51 | female | 3   | 1   | Dimethyl fumarate   |                                            | active | Remission |
| 63 | Yes | None | 37 | female | 8   | 2.5 | Ocrelizumab         | Natalizumab                                | stable | Remission |
| 64 | Yes | None | 33 | male   | 6   | 2   | Glatiramere acetate |                                            | NA     | Remission |
| 65 | Yes | None | 36 | female | 2   | 2   | Interferon- $\beta$ |                                            | NA     | Remission |
| 66 | Yes | None | 28 | female | 2   | 2   | Fingolimod          | Interferon- $\beta$ ,<br>Dimethyl fumarate | NA     | Remission |
| 67 | Yes | None | 23 | female | 0   | 1.5 | Untreated           |                                            | NA     | Remission |
| 68 | Yes | None | 36 | female | 1   | 0   | Untreated           |                                            | stable | Remission |
| 69 | Yes | None | 32 | male   | 7   | 1   | Teriflunomide       | Glatiramere acetate                        | stable | Remission |
| 70 | Yes | None | 36 | male   | 1   | 1   | Interferon- $\beta$ |                                            | stable | Remission |
| 71 | Yes | None | 58 | male   | 10  | 2   | Dimethyl fumarate   |                                            | NA     | Remission |
| 72 | Yes | None | 37 | male   | 13  | 1   | Glatiramere acetate |                                            | active | Remission |
| 73 | Yes | None | 44 | female | 0   | 2   | Untreated           |                                            | NA     | Remission |
| 74 | Yes | None | 58 | female | 2   | 1.5 | Untreated           |                                            | NA     | Remission |
| 75 | Yes | None | 47 | male   | 6   | 1.5 | Glatiramere acetate | Interferon- $\beta$ ,<br>Dimethyl fumarate | NA     | Remission |

|    |     |      |    |        |    |     |                     |                                     |        |           |
|----|-----|------|----|--------|----|-----|---------------------|-------------------------------------|--------|-----------|
| 76 | Yes | None | 32 | male   | 9  | 1   | Natalizumab         | Glatiramere acetate                 | stable | Remission |
| 77 | Yes | None | 47 | female | 2  | 3   | Natalizumab         | Glatiramere acetate                 | stable | Remission |
| 78 | Yes | None | 37 | female | 2  | 0   | Interferon- $\beta$ |                                     | NA     | Remission |
| 79 | Yes | None | 41 | female | 6  | 2.5 | Interferon- $\beta$ |                                     | NA     | Remission |
| 80 | Yes | None | 38 | female | 3  | 1   | Untreated           | Interferon- $\beta$                 | stable | Remission |
| 81 | Yes | None | 42 | female | 0  | 1   | Teriflunomide       |                                     | stable | Remission |
| 82 | Yes | None | 34 | female | 6  | 1.5 | Fingolimod          |                                     | stable | Remission |
| 83 | Yes | None | 38 | female | 20 | 6   | Teriflunomide       | Interferon- $\beta$ ,<br>Fingolimod | NA     | Remission |
| 84 | Yes | None | 42 | female | 13 | 2   | Untreated           |                                     | stable | Remission |

NA: not available; Disease: disease duration

**Supplementary Table 3: Subset of RRMS patients (Table 1) with available MRI imaging data.**

| ID # RRMS (46) | Age | Sex    | Duration (y) | EDSS | Treatment           | 1. MRI     | 2. MRI (blood) | 3. MRI     | Delta between 2. | Delta between 3. |
|----------------|-----|--------|--------------|------|---------------------|------------|----------------|------------|------------------|------------------|
| 1              | 32  | female | 7            | 3.5  | Fingolimod          | 2015-03-09 | 2016-08-30     | 2019-10-29 | 1 year           | 4 years          |
| Lesion volume  |     |        |              |      |                     | 2,248      | 1,99           | 1,683      | -11,48%          | -25,13%          |
| WMV            |     |        |              |      |                     | 428,09     | 432,9          | 449,2      | 1,13%            | 4,94%            |
| 3              | 67  | female | 17           | 3.5  | Interferon- $\beta$ | 2014-03-03 | 2015-01-23     | 2018-01-10 | 1 year           | 4 years          |
| Lesion volume  |     |        |              |      |                     | 47,838     | 50,835         | 42,844     | 6,26%            | -10,44%          |
| WMV            |     |        |              |      |                     | 450,1      | 452,0          | 462,0      | 0,42%            | 2,63%            |
| 4              | 53  | female | 4            | 2    | Teriflunomide       | 2017-03-23 | 2018-03-21     | 2019-03-28 | 1 year           | 2 years          |
| Lesion volume  |     |        |              |      |                     | 3,696      | 1,889          | 2,3        | -48,89%          | -37,77%          |
| WMV            |     |        |              |      |                     | 359,5      | 372,6          | 363,4      | 3,63%            | 1,08%            |
| 5              | 45  | female | 3            | 0    | Dimethyl fumarate   | 2017-05-15 | 2018-04-24     | 2019-04-30 | 1 year           | 2 years          |

|               |    |        |    |     |                     |                 |                 |                 |         |         |
|---------------|----|--------|----|-----|---------------------|-----------------|-----------------|-----------------|---------|---------|
| Lesion volume |    |        |    |     |                     | 14,061          | 12,199          | 13,656          | -13,24% | -2,88%  |
| WMV           |    |        |    |     |                     | 491,2           | 510,7           | 503,2           | 3,96%   | 2,45%   |
| 6             | 36 | male   | 2  | 3   | Fingolimod          | 2017-04-27      | 2019-04-15      | 2020-03-11      | 1 year  | 3 years |
| Lesion volume |    |        |    |     |                     | 9,522           | 9,307           | 9,084           | -2,26%  | -4,60%  |
| WMV           |    |        |    |     |                     | 505,5           | 523,7           | 521,9           | 3,60%   | 3,23%   |
| 7             | 37 | female | 13 | 2   | Natalizumab         | 2017-06-13      | 2018-04-04      | 2019-04-15      | 1 year  | 2 years |
| Lesion volume |    |        |    |     |                     | 31,9            | 30,3            | 31,2            | -4,90%  | -2,02%  |
| WMV           |    |        |    |     |                     | 414,5           | 438,4           | 437,5           | 5,78%   | 5,56%   |
| 8             | 50 | female | 3  | 2.5 | Fingolimod          | 2017-05-03      | 2018-03-21      | 2019-03-22      | 1 year  | 2 years |
| Lesion volume |    |        |    |     |                     | 5,45            | 4,435           | 5,682           | -18,62% | 4,26%   |
| WMV           |    |        |    |     |                     | 433,1           | 451,9           | 447,8           | 4,33%   | 3,39%   |
| 9             | 49 | female | 7  | 0   | Glatiramere acetate | 2017-04-13      | 2018-04-12      | 2019-04-18      | 1 year  | 2 years |
| Lesion volume |    |        |    |     |                     | 1,101           | 0,69            | 0,824           | -37,33% | -25,16% |
| WMV           |    |        |    |     |                     | 420,3           | 436,2           | 432,6           | 3,80%   | 2,93%   |
| 10            | 41 | female | 5  | 0   | Untreated           | 2016-05-23      | 2018-04-17      | 2020-11-27      | 1 year  | 4 years |
| Lesion volume |    |        |    |     |                     | 0,46            | 0,09            | 0,148           | -80,43% | -67,83% |
| WMV           |    |        |    |     |                     | 519,975<br>1587 | 540,563<br>4766 | 530,500<br>6714 | 3,96%   | 2,02%   |
| 11            | 38 | female | 3  | 0   | Glatiramere acetate | 2017-04-20      | 2018-04-19      | 2019-04-17      | 1 year  | 2 years |
| Lesion volume |    |        |    |     |                     | 3,363           | 2,634           | 2,446           | -21,68% | -27,27% |
| WMV           |    |        |    |     |                     | 398,442<br>8101 | 417,732<br>7881 | 418,594<br>4519 | 4,84%   | 5,06%   |
| 12            | 34 | female | 0  | 1   | Glatiramere acetate | 2017-04-20      | 2018-04-19      | 2019-04-18      | 1 year  | 2 years |

|               |    |        |    |     |                     |                 |                 |                 |         |         |
|---------------|----|--------|----|-----|---------------------|-----------------|-----------------|-----------------|---------|---------|
| Lesion volume |    |        |    |     |                     | 4,549           | 2,692           | 3,597           | -40,82% | -20,93% |
| WMV           |    |        |    |     |                     | 505,546<br>0815 | 518,251<br>8311 | 522,202<br>0874 | 2,51%   | 3,29%   |
| 13            | 39 | female | 0  | 3.5 | Untreated           | 2014-<br>04-29  | 2015-<br>04-30  | 2016-<br>04-26  | 1 year  | 2 years |
| Lesion volume |    |        |    |     |                     | 1,422           | 1,535           | 1,205           | 7,95%   | -15,26% |
| WMV           |    |        |    |     |                     | 485,191<br>3147 | 478,676<br>6968 | 473,232<br>605  | -1,34%  | -2,46%  |
| 14            | 40 | female | 6  | 4   | Dimethyl fumarate   | 2013-<br>08-23  | 2014-<br>08-26  | 2015-<br>08-26  | 1 year  | 2 years |
| Lesion volume |    |        |    |     |                     | 4,918           | 6,573           | 6,922           | 33,65%  | 40,75%  |
| WMV           |    |        |    |     |                     | 406,498<br>1689 | 404,568<br>6951 | 399,942<br>5354 | -0,47%  | -1,61%  |
| 15            | 51 | female | 1  | 3.5 | Natalizumab         | 2014-<br>09-15  | 2016-<br>09-12  | 2017-<br>10-30  | 1 year  | 3 years |
| Lesion volume |    |        |    |     |                     | 17,595          | 21,366          | 16,234          | 21,43%  | -7,74%  |
| WMV           |    |        |    |     |                     | 513,489<br>3799 | 506,353<br>9734 | 521,153<br>8696 | -1,39%  | 1,49%   |
| 16            | 40 | female | 11 | 0   | Interferon- $\beta$ | 2017-<br>12-11  | 2018-<br>06-18  | 2019-<br>11-11  | 1 year  | 2 years |
| Lesion volume |    |        |    |     |                     | 0,11            | 0,149           | 0,244           | 35,45%  | 121,8%  |
| WMV           |    |        |    |     |                     | 475,812<br>6526 | 471,123<br>9319 | 471,878<br>3569 | -0,99%  | -0,83%  |
| 17            | 46 | female | 7  | 2   | Untreated           | 2017-<br>05-10  | 2018-<br>04-11  | 2019-<br>04-08  | 1 year  | 2 years |
| Lesion volume |    |        |    |     |                     | 6,607           | 4,262           | 4,584           | -35,49% | -30,62% |
| WMV           |    |        |    |     |                     | 532,578<br>3081 | 554,979<br>187  | 552,043<br>0908 | 4,21%   | 3,65%   |
| 18            | 47 | female | 4  | 6.5 | Untreated           | 2014-<br>04-07  | 2015-<br>04-13  | 2016-<br>04-25  | 1 year  | 2 years |

|               |    |        |    |     |                     |                 |                 |                 |         |         |
|---------------|----|--------|----|-----|---------------------|-----------------|-----------------|-----------------|---------|---------|
| Lesion volume |    |        |    |     |                     | 0,787           | 0,77            | 0,774           | -2,16%  | -1,65%  |
| WMV           |    |        |    |     |                     | 431,066<br>864  | 424,463<br>1653 | 427,176<br>7578 | -1,53%  | -0,90%  |
| 21            | 63 | female | 13 | 4   | Interferon-β        | 2016-<br>09-12  | 2018-<br>03-08  | 2019-<br>10-31  | 1 year  | 3 years |
| Lesion volume |    |        |    |     |                     | 11,52           | 10,787          | 11,098          | -6,36%  | -3,66%  |
| WMV           |    |        |    |     |                     | 409,706<br>3904 | 424,771<br>0876 | 424,098<br>3887 | 3,68%   | 3,51%   |
| 22            | 37 | female | 20 | 2   | Fingolimod          | 2017-<br>04-13  | 2018-<br>04-26  | 2019-<br>04-23  | 1 year  | 2 years |
| Lesion volume |    |        |    |     |                     | 21,252          | 33,274          | 34,873          | 56,57%  | 64,09%  |
| WMV           |    |        |    |     |                     | 426,736<br>8164 | 426,111<br>6638 | 411,847<br>9919 | -0,15%  | -3,49%  |
| 23            | 40 | male   | 5  | 0   | Natalizumab         | 2017-<br>04-24  | 2018-<br>04-23  | 2019-<br>05-21  | 1 year  | 2 years |
| Lesion volume |    |        |    |     |                     | 3,268           | 1,978           | 1,47            | -39,47% | -55,02% |
| WMV           |    |        |    |     |                     | 533,756<br>2256 | 553,872<br>4365 | 552,301<br>0864 | 3,77%   | 3,47%   |
| 24            | 51 | male   | 7  | 6   | Untreated           | 2014-<br>04-24  | 2015-<br>04-23  | 2016-<br>04-27  | 1 year  | 2 years |
| Lesion volume |    |        |    |     |                     | 2,737           | 2,7             | 3,05            | -1,35%  | 11,44%  |
| WMV           |    |        |    |     |                     | 496,728<br>2104 | 498,379<br>7913 | 496,195<br>9534 | 0,33%   | -0,11%  |
| 26            | 50 | female | 3  | 2.5 | Glatiramere acetate | 2017-<br>06-12  | 2018-<br>04-16  | 2019-<br>07-05  | 1 year  | 2 years |
| Lesion volume |    |        |    |     |                     | 1,734           | 1,307           | 1,319           | -24,63% | -23,93% |
| WMV           |    |        |    |     |                     | 455,609<br>9854 | 468,789<br>5813 | 468,448<br>4253 | 2,89%   | 2,82%   |
| 27            | 33 | male   | 8  | 2   | Cladribin           | 2017-<br>03-29  | 2018-<br>03-26  | 2019-<br>06-17  | 1 year  | 2 years |

|               |    |        |    |     |                     |                 |                 |                 |         |         |
|---------------|----|--------|----|-----|---------------------|-----------------|-----------------|-----------------|---------|---------|
| Lesion volume |    |        |    |     |                     | 26,243          | 24,418          | 26,537          | -6,95%  | 1,12%   |
| WMV           |    |        |    |     |                     | 427,618<br>4387 | 465,778<br>2898 | 465,556<br>5796 | 8,92%   | 8,87%   |
| 28            | 42 | female | 23 | 3   | Interferon-β        | 2017-06-06      | 2018-04-16      | 2019-04-08      | 1 year  | 2 years |
| Lesion volume |    |        |    |     |                     | 0,629           | 0,275           | 0,408           | -56,28% | -35,14% |
| WMV           |    |        |    |     |                     | 494,392<br>4866 | 515,499<br>3286 | 508,189<br>5447 | 4,27%   | 2,79%   |
| 29            | 34 | female | 8  | 0   | Untreated           | 2017-06-01      | 2018-04-16      | 2019-12-10      | 1 year  | 2 years |
| Lesion volume |    |        |    |     |                     | 0,575           | 0,379           | 0,551           | -34,09% | -4,17%  |
| WMV           |    |        |    |     |                     | 512,289<br>4287 | 530,144<br>9585 | 532,526<br>001  | 3,49%   | 3,95%   |
| 30            | 22 | female | 5  | 1.5 | Ocrelizumab         | 2017-07-03      | 2018-01-30      | 2019-03-12      | 1 year  | 2 years |
| Lesion volume |    |        |    |     |                     | 1,381           | 0,439           | 0,906           | -68,21% | -34,40% |
| WMV           |    |        |    |     |                     | 407,237<br>6404 | 436,721<br>344  | 435,825<br>0732 | 7,24%   | 7,02%   |
| 31            | 49 | male   | 12 | 2   | Interferon-β        | 2017-04-19      | 2018-02-01      | 2019-05-28      | 1 year  | 2 years |
| Lesion volume |    |        |    |     |                     | 0,471           | 0,218           | 0,179           | -53,72% | -62,00% |
| WMV           |    |        |    |     |                     | 556,175<br>7813 | 571,498<br>291  | 569,443<br>1763 | 2,75%   | 2,39%   |
| 45            | 40 | male   | 20 | 4   | Ocrelizumab         | 2015-08-19      | 2018-05-18      | 2019-05-08      | 1 year  | 4 years |
| Lesion volume |    |        |    |     |                     | 34,392          | 37,832          | 38,701          | 10,00%  | 12,53%  |
| WMV           |    |        |    |     |                     | 504,735<br>8398 | 507,849<br>884  | 508,183<br>7769 | 0,62%   | 0,68%   |
| 46            | 54 | male   | 7  | 6.5 | Glatiramere acetate | 2017-05-04      | 2018-04-18      | 2019-07-29      | 1 year  | 2 years |

|               |    |        |    |     |                        |                 |                 |                 |         |         |
|---------------|----|--------|----|-----|------------------------|-----------------|-----------------|-----------------|---------|---------|
| Lesion volume |    |        |    |     |                        | 2,871           | 2,136           | 4,086           | -25,60% | 42,32%  |
| WMV           |    |        |    |     |                        | 498,039<br>5203 | 513,880<br>6152 | 505,150<br>238  | 3,18%   | 1,43%   |
| 50            | 38 | male   | 8  | 0   | Untreated              | 2017-<br>05-18  | 2018-<br>03-21  | 2019-<br>03-05  | 1 year  | 2 years |
| Lesion volume |    |        |    |     |                        | 3,808           | 3,468           | 4,003           | -8,93%  | 5,12%   |
| WMV           |    |        |    |     |                        | 564,271<br>0571 | 577,970<br>1538 | 571,593<br>3228 | 2,43%   | 1,30%   |
| 52            | 64 | female | 5  | 2   | Glatiramere<br>acetate | 2017-<br>04-12  | 2018-<br>04-05  | 2019-<br>03-19  | 1 year  | 2 years |
| Lesion volume |    |        |    |     |                        | 0,22            | 0,195           | 0,212           | -11,36% | -3,64%  |
| WMV           |    |        |    |     |                        | 452,350<br>647  | 473,180<br>2063 | 469,313<br>2324 | 4,60%   | 3,75%   |
| 53            | 55 | female | 8  | 2.5 | Fingolimod             | 2017-<br>06-06  | 2018-<br>04-09  | 2019-<br>10-04  | 1 year  | 2 years |
| Lesion volume |    |        |    |     |                        | 8,5             | 6,535           | 7,147           | -23,12% | -15,92% |
| WMV           |    |        |    |     |                        | 531,983<br>1543 | 554,390<br>9302 | 548,707<br>8857 | 4,21%   | 3,14%   |
| 54            | 43 | female | 6  | 0   | Glatiramere<br>acetate | 2017-<br>05-10  | 2018-<br>04-12  | 2019-<br>06-13  | 1 year  | 2 years |
| Lesion volume |    |        |    |     |                        | 1,715           | 0,791           | 1,105           | -53,88% | -35,57% |
| WMV           |    |        |    |     |                        | 435,962<br>0056 | 465,223<br>0835 | 456,397<br>2473 | 6,71%   | 4,69%   |
| 55            | 26 | female | 6  | 0   | Dimethyl<br>fumarate   | 2017-<br>06-08  | 2018-<br>04-18  | 2019-<br>03-28  | 1 year  | 2 years |
| Lesion volume |    |        |    |     |                        | 0,924           | 0,367           | 0,498           | -60,28% | -46,10% |
| WMV           |    |        |    |     |                        | 513,546<br>9971 | 540,766<br>2354 | 532,520<br>752  | 5,30%   | 3,69%   |
| 56            | 40 | female | 15 | 0   | Dimethyl<br>fumarate   | 2017-<br>03-23  | 2018-<br>04-19  | 2019-<br>09-19  |         |         |



|               |    |        |     |     |                   |                 |                 |                 |         |         |
|---------------|----|--------|-----|-----|-------------------|-----------------|-----------------|-----------------|---------|---------|
| Lesion volume |    |        |     |     |                   | 0,619           | 0,286           | 0,485           | -53,80% | -21,65% |
| WMV           |    |        |     |     |                   | 455,295<br>7764 | 472,950<br>3784 | 467,081<br>4209 | 3,88%   | 2,59%   |
| 57            | 56 | female | 15  | 1.5 | Interferon-β      | 2017-<br>06-12  | 2018-<br>04-23  | 2019-<br>04-29  | 1 year  | 2 years |
| Lesion volume |    |        |     |     |                   | 8,818           | 6,037           | 7,593           | -31,54% | -13,89% |
| WMV           |    |        |     |     |                   | 438,125<br>2441 | 462,196<br>9604 | 463,551<br>6357 | 5,49%   | 5,80%   |
| 58            | 43 | male   | 9,5 | 0   | Fingolimod        | 2017-<br>03-23  | 2018-<br>04-26  | 2019-<br>03-28  | 1 year  | 2 years |
| Lesion volume |    |        |     |     |                   | 4,713           | 3,307           | 3,535           | -29,83% | -24,99% |
| WMV           |    |        |     |     |                   | 555,635<br>437  | 579,194<br>6411 | 574,842<br>8345 | 4,24%   | 3,46%   |
| 61            | 33 | female | 3   | 0   | Dimethyl fumarate | 2017-<br>05-23  | 2018-<br>04-10  | 2019-<br>03-06  | 1 year  | 2 years |
| Lesion volume |    |        |     |     |                   | 10,636          | 8,98            | 9,1             | -15,57% | -14,44% |
| WMV           |    |        |     |     |                   | 486,332<br>8552 | 505,263<br>8855 | 506,255<br>9814 | 3,89%   | 4,10%   |
| 62            | 51 | female | 3   | 1   | Dimethyl fumarate | 2017-<br>05-11  | 2018-<br>04-18  | 2019-<br>05-20  | 1 year  | 2 years |
| Lesion volume |    |        |     |     |                   | 4,854           | 4,09            | 5,305           | -15,74% | 9,29%   |
| WMV           |    |        |     |     |                   | 478,490<br>6006 | 496,296<br>7834 | 491,857<br>2693 | 3,72%   | 2,79%   |
| 63            | 37 | female | 8   | 2.5 | Ocrelizumab       | 2017-<br>08-16  | 2018-<br>05-29  | 2019-<br>08-06  | 1 year  | 2 years |
| Lesion volume |    |        |     |     |                   | 9,662           | 8,708           | 9,034           | -9,87%  | -6,50%  |
| WMV           |    |        |     |     |                   | 486,562<br>4695 | 503,475<br>3113 | 500,576<br>8433 | 3,48%   | 2,88%   |
| 68            | 36 | female | 1   | 0   | Untreated         | 2017-<br>03-31  | 2018-<br>04-03  | 2019-<br>03-20  | 1 year  | 2 years |

|               |    |        |    |     |                     |                 |                 |                 |         |         |
|---------------|----|--------|----|-----|---------------------|-----------------|-----------------|-----------------|---------|---------|
| Lesion volume |    |        |    |     |                     | 1,705           | 0,932           | 1,101           | -45,34% | -35,43% |
| WMV           |    |        |    |     |                     | 500,825<br>1648 | 515,845<br>1538 | 514,310<br>0586 | 3,00%   | 2,69%   |
| 69            | 32 | male   | 7  | 1   | Teriflunomide       | 2017-<br>04-21  | 2018-<br>04-09  | 2019-<br>04-18  | 1 year  | 2 years |
| Lesion volume |    |        |    |     |                     | 2,928           | 1,469           | 2,236           | -49,83% | -23,63% |
| WMV           |    |        |    |     |                     | 560,647<br>7051 | 579,100<br>0366 | 576,823<br>1201 | 3,29%   | 2,89%   |
| 70            | 36 | male   | 1  | 1   | Interferon- $\beta$ | 2017-<br>04-04  | 2018-<br>04-25  | 2019-<br>08-29  | 1 year  | 2 years |
| Lesion volume |    |        |    |     |                     | 7,518           | 5,542           | 6,836           | -26,28% | -9,07%  |
| WMV           |    |        |    |     |                     | 480,070<br>8923 | 501,844<br>4519 | 500,642<br>5171 | 4,54%   | 4,29%   |
| 76            | 32 | male   | 9  | 1   | Natalizumab         | 2017-<br>04-06  | 2018-<br>04-09  | 2019-<br>04-08  | 1 year  | 2 years |
| Lesion volume |    |        |    |     |                     | 3,39            | 2,031           | 2,568           | -40,09% | -24,25% |
| WMV           |    |        |    |     |                     | 489,529<br>3274 | 512,486<br>5723 | 504,738<br>3118 | 4,69%   | 3,11%   |
| 82            | 34 | female | 6  | 1.5 | Fingolimod          | 2017-<br>04-13  | 2018-<br>04-12  | 2019-<br>04-23  | 1 year  | 2 years |
| Lesion volume |    |        |    |     |                     | 5,897           | 5,595           | 6,053           | -5,12%  | 2,65%   |
| WMV           |    |        |    |     |                     | 461,804<br>3213 | 468,259<br>7351 | 466,918<br>4875 | 1,40%   | 1,11%   |
| 84            | 42 | female | 13 | 2   | Untreated           | 2017-<br>04-27  | 2018-<br>04-26  | 2019-<br>04-29  | 1 year  | 2 years |
| Lesion volume |    |        |    |     |                     | 1,218           | 0,978           | 1,068           | -19,70% | -12,32% |
| WMV           |    |        |    |     |                     | 500,105<br>3162 | 518,604<br>5532 | 517,329<br>9561 | 3,70%   | 3,44%   |

Note: lesion volume in ml; WMV: white matter volume (in ml); Disease: disease duration, Delta between 2.: Difference between the 1<sup>st</sup> and 2<sup>nd</sup> MRI; Delta between 3.: Difference between the 1<sup>st</sup> and 3<sup>rd</sup> MRI.
